# Supplementary material
Source: Springer Nature journal article supplement (https://www.springermedizin.de/resource/supplementary/12883_2011_548_MOESM1_ESM.pdf/9455348)
Supplement: MOESM1 [file 9455348]

**Recruitment**  
Ambulatory adults within 1 year of stroke onset discharged from acute and rehabilitation facilities

**Screening and Baseline Outcome Assessment**

Slow  
<0.5  
m/s

Fast  
≥0.5  
m/s

Stratified  
Random  
Allocation

5 to 7 week  
intervention

**Motor Learning Walking Program**  
Varied overground walking-task practice  
15 sessions

**Body-weight-supported Treadmill Training**  
15 sessions

Post-intervention

**Post-intervention Outcome Assessment**

**Post-intervention Outcome Assessment**

2 months post-intervention

No Intervention  
**Follow up Outcome Assessment**

No Intervention  
**Follow up Outcome Assessment**
